# Supplementary material for: A chitosan-coated PCL/nano-hydroxyapatite aerogel integrated with a nanofiber membrane for providing antibacterial activity and guiding bone regeneration
Source: Royal Society of Chemistry journal article supplement (doi:10.1039/d4nr00563e), 2024-01-01
Supplement: d4nr00563e1.pdf [file d4nr00563e1.pdf]

## Supporting Information

### **Chitosan-coated PCL/nano-hydroxyapatite aerogel integrated with nanofiber membrane for potential use in antibacterial and guiding bone regeneration**

*Xinyuan Deng<sup>a,1</sup>, Chenghao Yu<sup>b,1</sup>, Xiaopei Zhang<sup>a,b,1</sup>, Xunmeng Tang<sup>a</sup>, Qingxia Guo<sup>c</sup>, Manfei Fu<sup>b</sup>, Yuanfei Wang<sup>d,\*</sup>, Kuanjun Fang<sup>a,e,\*</sup>, Tong Wu<sup>a,b,c,\*</sup>*

<sup>a</sup>Shandong Key Laboratory of Medical and Health Textile Materials, College of Textile & Clothing, Collaborative Innovation Center for Eco-textiles of Shandong Province and the Ministry of Education, Qingdao 266071, China.

<sup>b</sup>The Affiliated Hospital of Qingdao University, Qingdao Medical College, Qingdao University, Qingdao 266071, China.

<sup>c</sup>Institute of Neuroregeneration & Neurorehabilitation, Department of Pathophysiology, School of Basic Medicine, Qingdao University, Qingdao, 266071, China.

<sup>d</sup>Qingdao Stomatological Hospital Affiliated to Qingdao University, Qingdao, China.

<sup>e</sup>Laboratory for Manufacturing Low Carbon and Functionalized Textiles in the Universities of Shandong Province, Qingdao, State Key Laboratory for Biofibers and Eco-textiles, Qingdao University, Qingdao 266071, China.

<sup>1</sup>X. Deng, C. Yu, and X. Zhang contributed equally to this study.

\*Corresponding authors: [zhizunbao19@163.com](mailto:zhizunbao19@163.com) (Y. Wang), [kqfang@qdu.edu.cn](mailto:kqfang@qdu.edu.cn) (K. Fang), [twu@qdu.edu.cn](mailto:twu@qdu.edu.cn) (T. Wu).

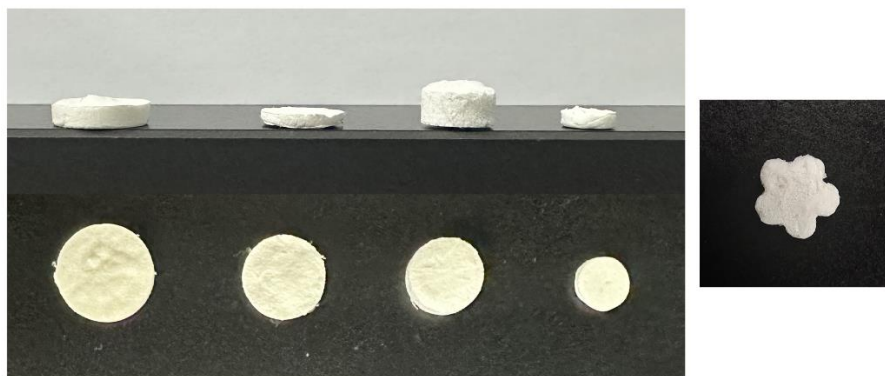

**Fig. S1.** Digital photos of composite scaffolds of different shapes and sizes.

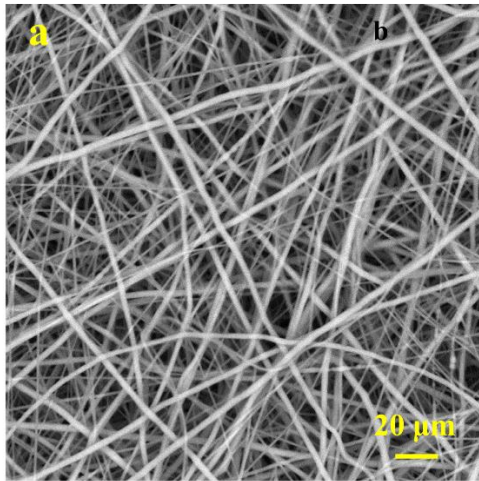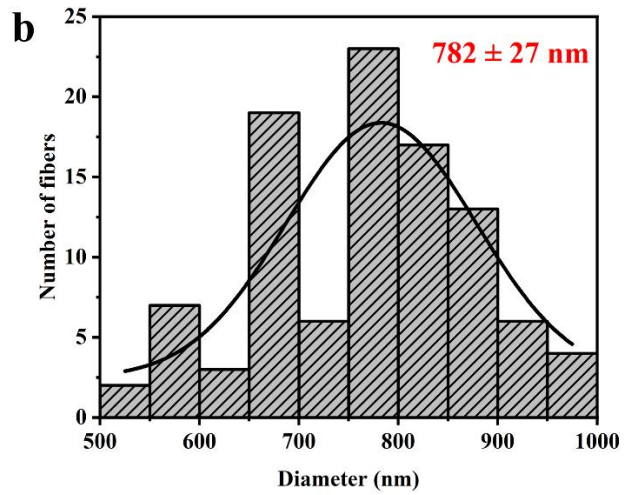

**Fig. S2.** (a) Morphological characterization of the nanofibers in dense layer. (b) Histogram of the distribution of fiber diameter.

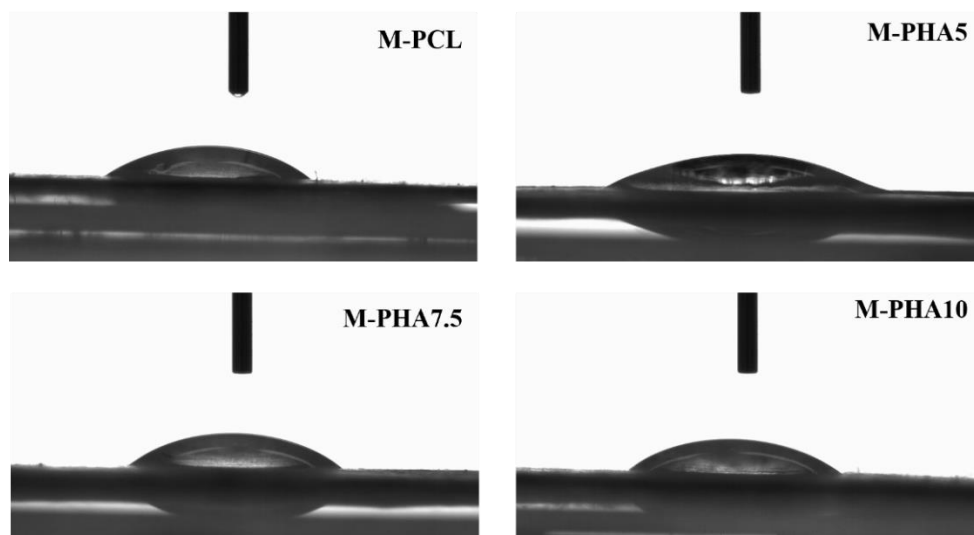

**Fig. S3.** Measurements of water contact angle of the different aligned nanofiber membranes after plasma treatment.

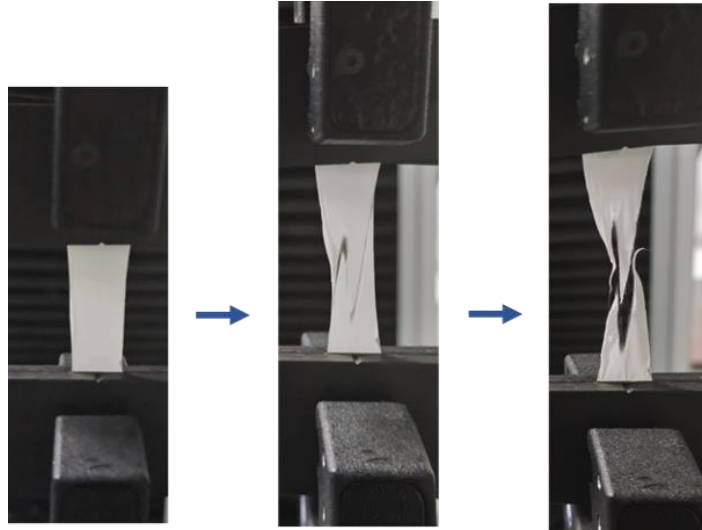

**Fig. S4.** Photographs showing the process of tensile test.

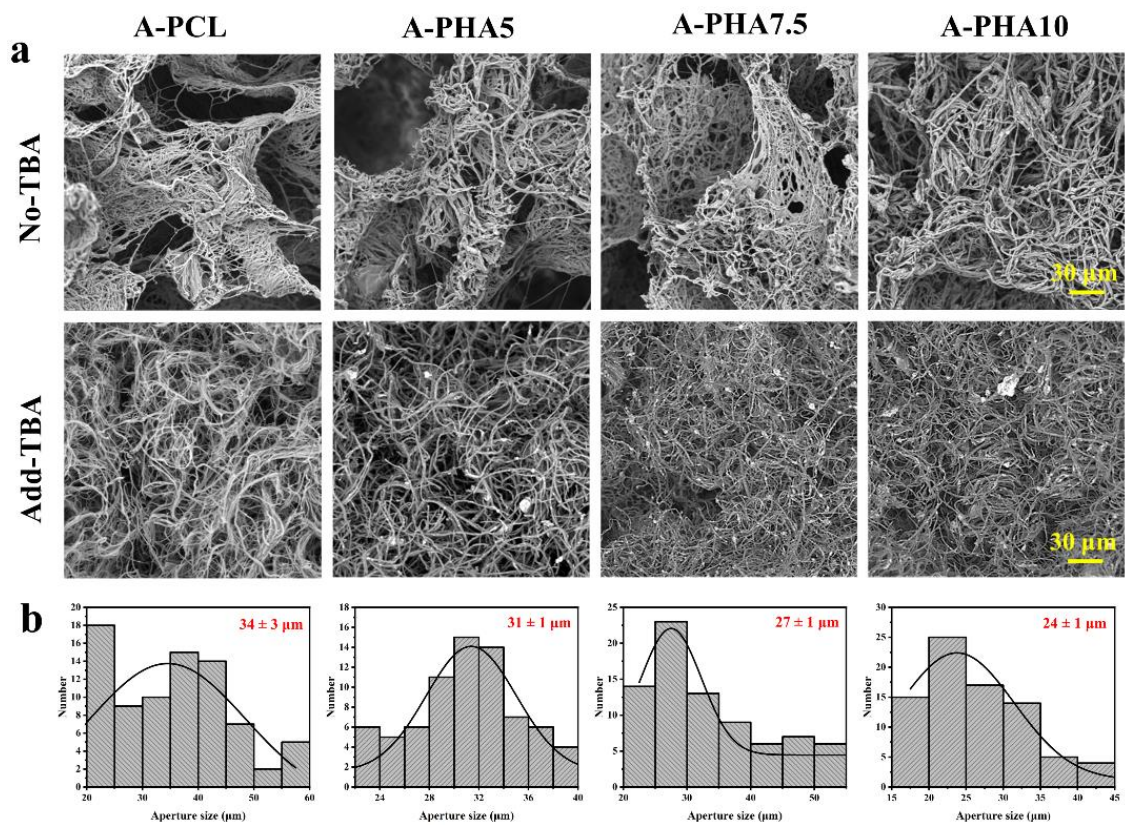

**Fig. S5.** (a) Morphological characterization of the aerogels with or without TBA treatment. (b) Distribution of pore size of the different aerogels after TBA treatment.

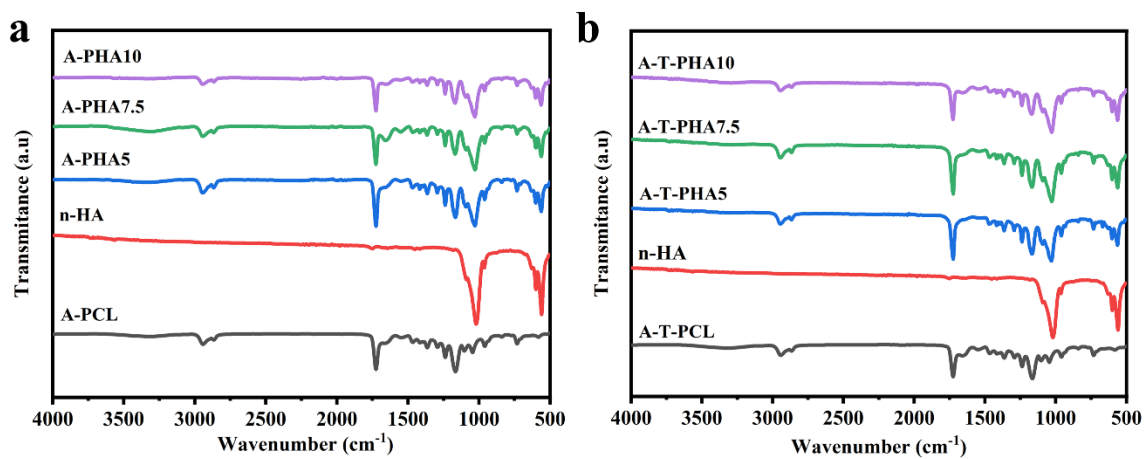

**Fig. S6** (a) FTIR spectra of the different aerogels without TBA treatment. (b) FTIR spectra of different aerogels treated with TBA.

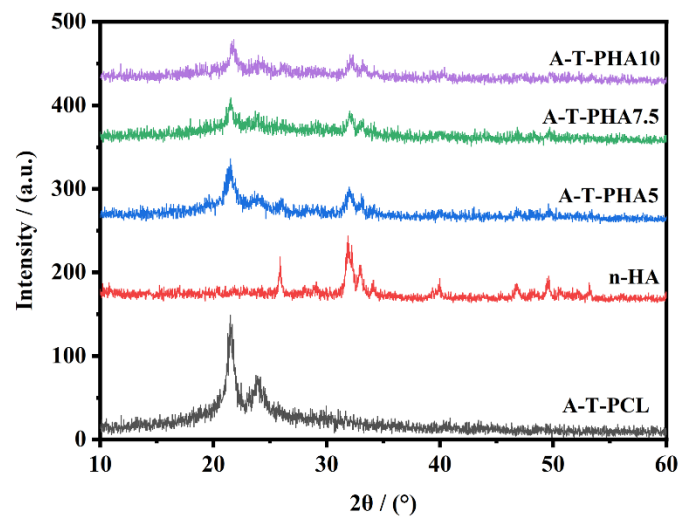

**Fig. S7.** XRD patterns of n-HA and the different aerogels.



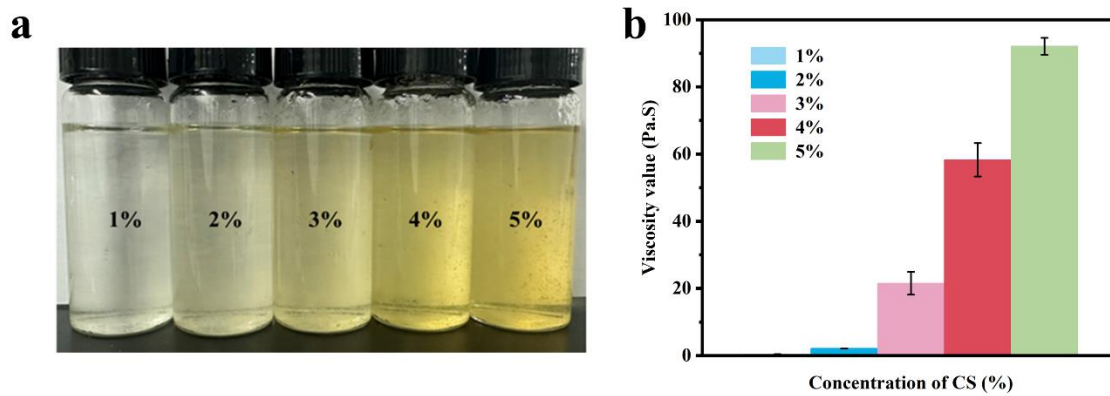

**Fig. S8.** (a) Photographs of the CS solutions with different concentrations. (b) The viscosity of different CS solutions.

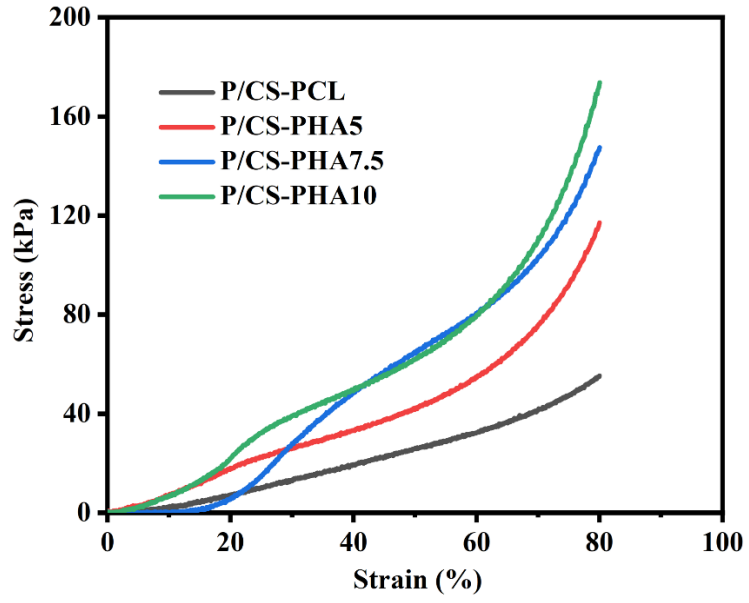

**Fig. S9.** Compressive stress-strain curves of the composite scaffolds containing different n-HA contents and without TBA treatment.

**Table S1.** The maximum tensile stress and strain of the aligned nanofiber membranes.

| Aligned nanofiber membranes | Maximum strain/% | Maximum stress/MPa |
|-----------------------------|------------------|--------------------|
| M-PCL                       | 85.98            | 43.95              |
| M-PHA5                      | 73.93            | 33.09              |
| M-PHA7.5                    | 93.78            | 22.81              |
| M-PHA10                     | 89.73            | 16.24              |
